# Supplementary material for: Smad5 acts as an intracellular pH messenger and maintains bioenergetic homeostasis
Source: PubMed Central journal article supplement (PMC5587853; doi:10.1038/cr.2017.85), 2017-07-04
Supplement: cr201785x1.pdf [file cr201785x1.pdf]

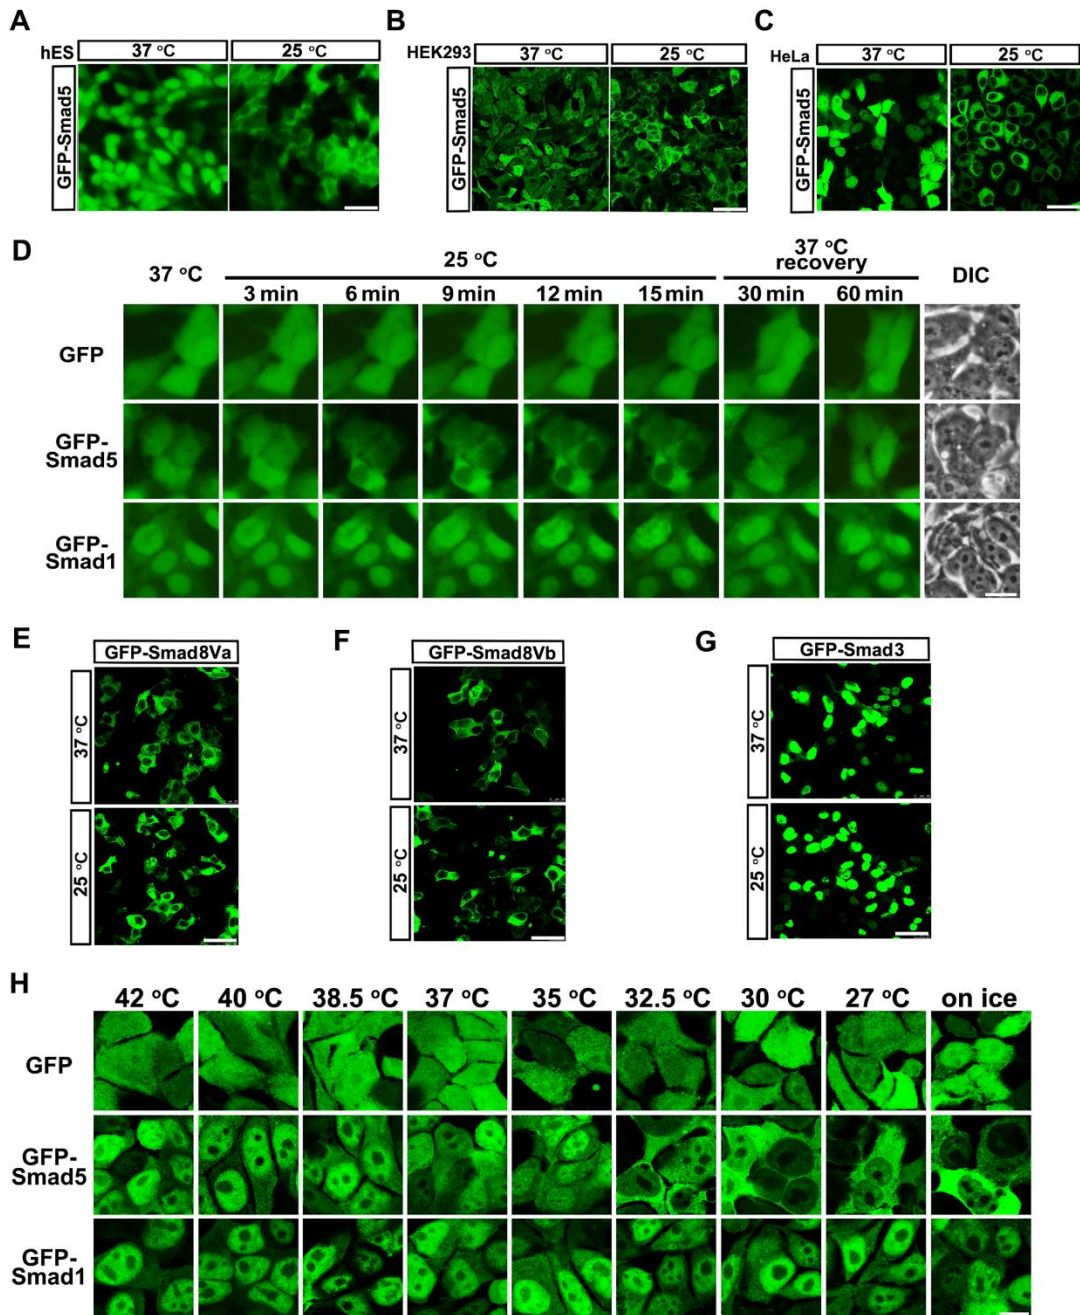

**Supplementary information, Figure S1.** Smad5 accumulates in cytoplasm at low temperature. **(A-C)** In hES **(A)**, HEK293 **(B)** and HeLa **(C)** cells, GFP-Smad5 shows apparent cytoplasmic accumulation at 25°C. Scale bars, 50  $\mu\text{m}$ . **(D)** Timelapse experiments show that placing the cells at 25°C gradually drives GFP-Smad5 into the cytoplasm, but neither GFP nor GFP-Smad1 is affected. Bright field images show nuclear morphology. Scale bar, 10  $\mu\text{m}$ . **(E-G)** The nucleocytoplasmic distribution of other downstream signaling mediators of TGF $\beta$  superfamily, Smad8a **(E)**, Smad8b **(F)** and Smad3 **(G)**, remains unchanged upon temperature shift. Scale bars, 50  $\mu\text{m}$ . **(H)** Confocal images show that GFP-Smad5 is largely distributed in the cytoplasm at a temperature lower than 32.5°C. Scale bar, 10  $\mu\text{m}$ .
