# Supplementary material for: Smad5 acts as an intracellular pH messenger and maintains bioenergetic homeostasis
Source: PubMed Central journal article supplement (PMC5587853; doi:10.1038/cr.2017.85), 2017-07-04
Supplement: cr201785x2.pdf [file cr201785x2.pdf]

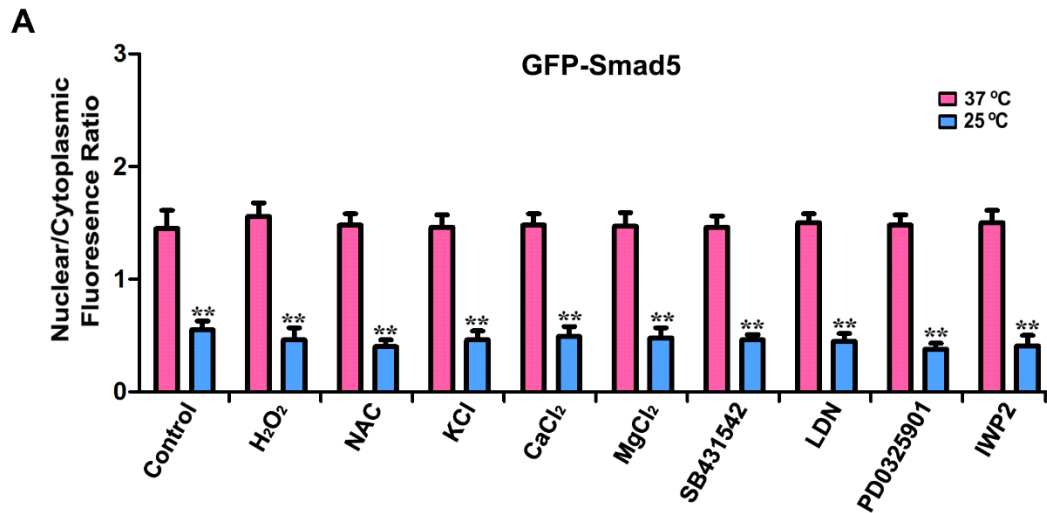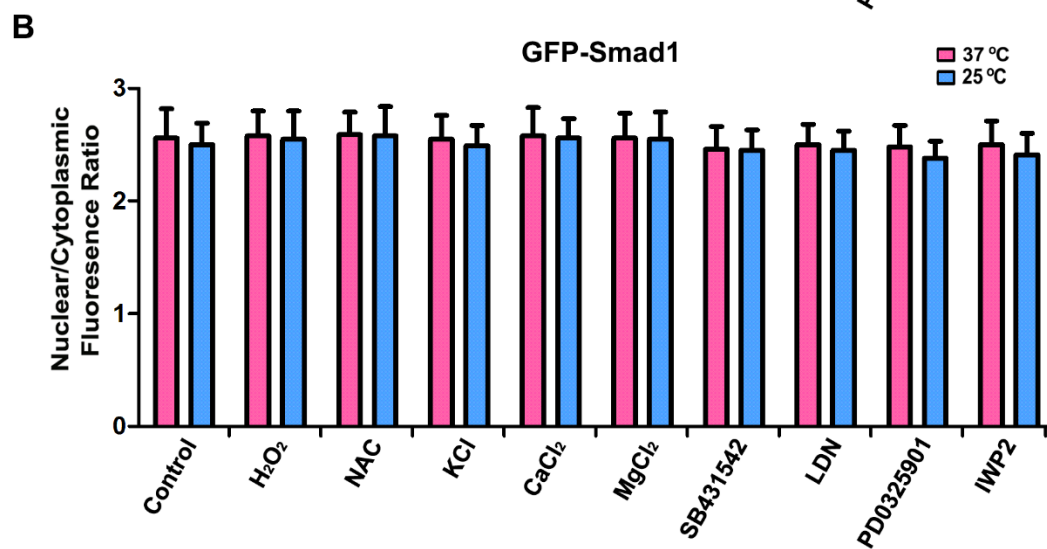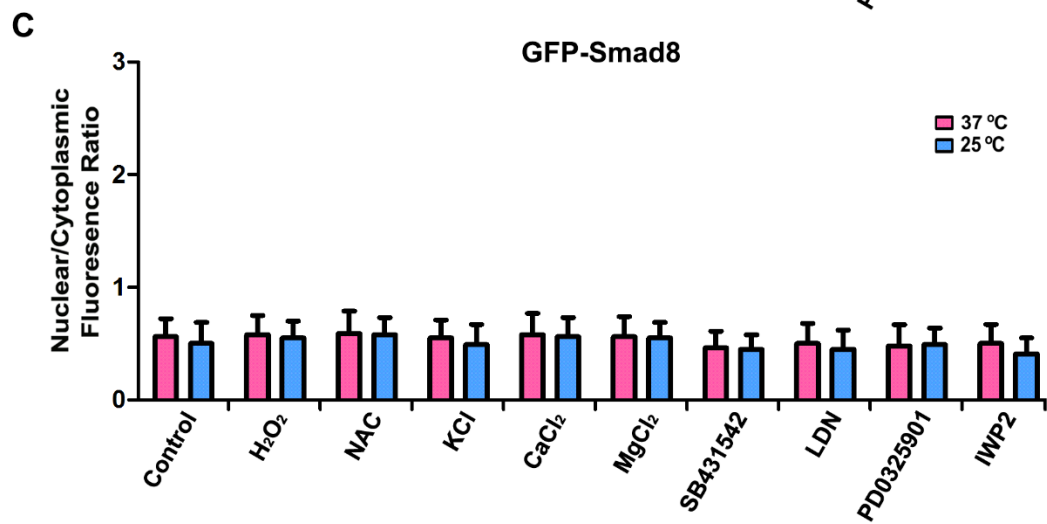

**Supplementary information, Figure S2.** Oxidative stress, membrane potential and signaling modifiers could not obviously affect Smad5, Smad1 or Smad8 subcellular distribution under normal or low temperature culture conditions. NAC, N-acetylcysteine (anti-oxidant); SB431542, a selective inhibitor of TGF $\beta$  superfamily type I activin receptor-like kinase (ALK) receptors; LDN193189, a selective inhibitor of BMP type I receptors; PD0325901, a selective inhibitor of MEK and subsequently inhibits ERK signaling; IWP2, a selective inhibitor of canonical Wnt signaling. Data are presented as mean  $\pm$  s.e.m of three independent experiments. \*\*p < 0.01.
