# Supplementary material for: Smad5 acts as an intracellular pH messenger and maintains bioenergetic homeostasis
Source: PubMed Central journal article supplement (PMC5587853; doi:10.1038/cr.2017.85), 2017-07-04
Supplement: cr201785x3.pdf [file cr201785x3.pdf]

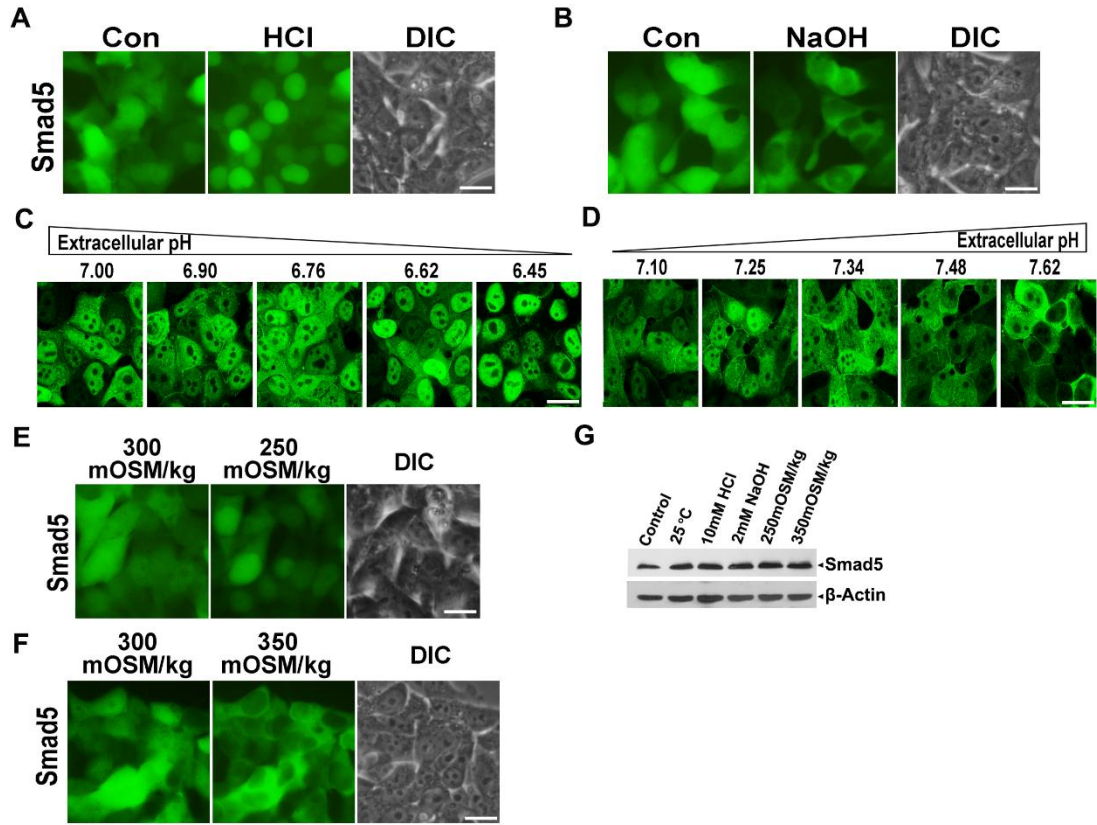

**Supplementary information, Figure S3.** Smad5 responses to pHe and osmolarity fluctuations. **(A)** Treatment of *GFP-Smad5* HEK293 cells with 10 mM hydrochloric acid for 10 min at 37°C leads to the rapid nuclear accumulation of Smad5. Scale bar, 10  $\mu$ m. **(B)** Treatment of the cells with 2 mM sodium hydroxide for 2 min at 37°C induces rapid translocation of Smad5 into the cytoplasm. Scale bar, 10  $\mu$ m. **(C, D)** Confocal images show more GFP-Smad5 nuclear accumulation at lower pHe, while cytoplasmic accumulation at higher pHe. Scale bars, 10  $\mu$ m. **(E)** Smad5 shows more obvious nuclear accumulation when cells are exposed to hypotonic solutions at an osmolarity of 250 mOSM/kg. Scale bar, 10  $\mu$ m. **(F)** Smad5 translocates into the cytoplasm when extracellular osmolarity is increased to 350 mOSM/kg. Scale bar, 10  $\mu$ m. **(G)** Western blotting shows the total level of Smad5 under various temperature, pHe and osmolarity conditions.
