# Supplementary material for: Smad5 acts as an intracellular pH messenger and maintains bioenergetic homeostasis
Source: PubMed Central journal article supplement (PMC5587853; doi:10.1038/cr.2017.85), 2017-07-04
Supplement: cr201785x4.pdf [file cr201785x4.pdf]

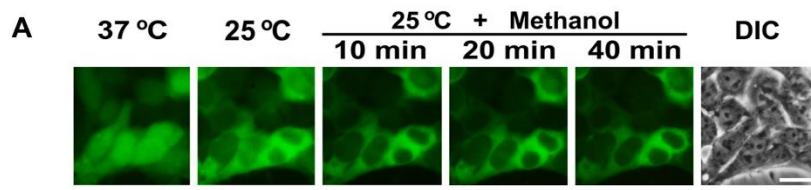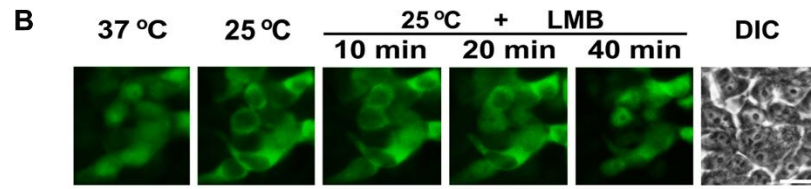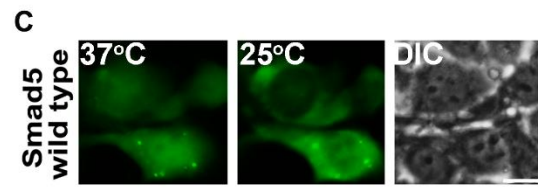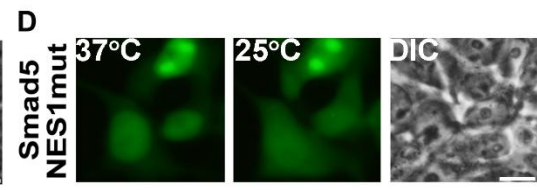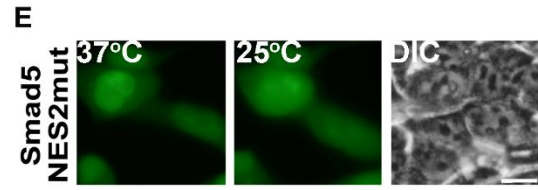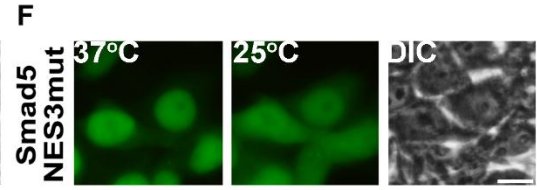

**Supplementary information, Figure S4.** Smad5 subjects to accelerated CRM1-dependent nuclear export at low temperature and three NESs are involved in its rapid nuclear export. **(A, B)** *GFP-Smad5* HEK293 cell lines were placed at 25°C for 30 min in order to transport Smad5 from nucleus to cytoplasm completely. The cells were then treated with methanol or 5ng/ml LMB for 40 min at 25°C. Fluorescence study now shows exclusive nuclear distribution of Smad5 under LMB treatment. Scale bars, 10  $\mu$ m. **(C)** HEK293 cells with transient *GFP-Smad5* overexpression show nuclear export of Smad5 at 25°C. Scale bar, 10  $\mu$ m. **(D-F)** Individual mutation of the three NESs promotes nuclear accumulation of Smad5 at 37°C and all three mutants exhibit a slower nuclear export rate upon low temperature challenge. Scale bars, 10  $\mu$ m.
