# Supplementary material for: Smad5 acts as an intracellular pH messenger and maintains bioenergetic homeostasis
Source: PubMed Central journal article supplement (PMC5587853; doi:10.1038/cr.2017.85), 2017-07-04
Supplement: cr201785x5.pdf [file cr201785x5.pdf]

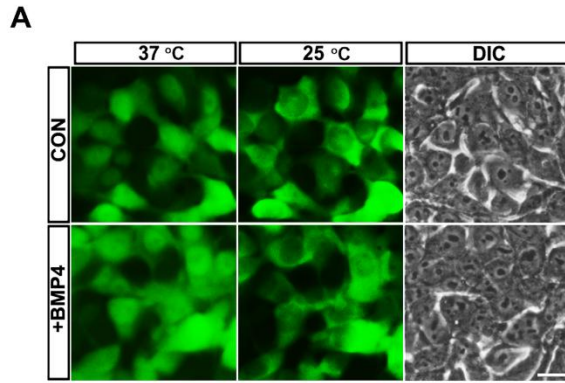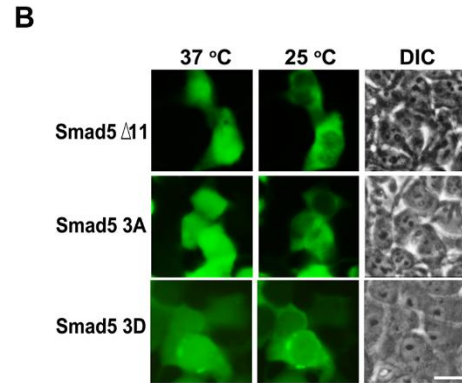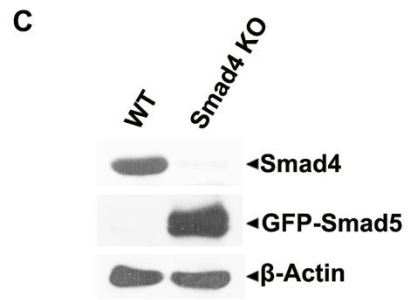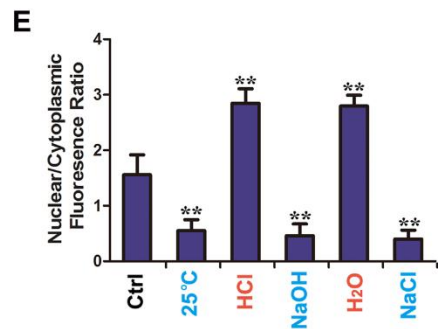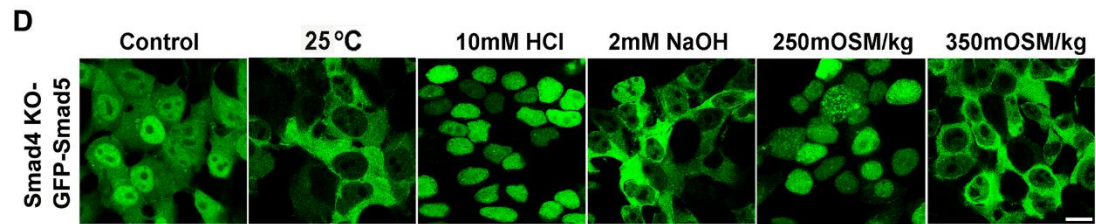

**Supplementary information, Figure S5.** Environmental cues-triggered Smad5 translocation is BMP signaling-independent. **(A)** Low temperature could still induce GFP-Smad5 cytoplasmic accumulation when cells were pretreated with BMP4 at 37°C for 1 hr. **(B)** Deletion of the C-terminal 11 amino acids containing SSVS motif (Smad5  $\Delta$ 11), or mutation of the three potential phosphorylation sites to alanine (3A) or aspartic acid (3D) does not affect low temperature-mediated Smad5 nucleocytoplasmic shuttling. Scale bar, 10  $\mu$ m. **(C)** Western blotting shows that *GFP-Smad5* is overexpressed in *Smad4* KO HEK293 cells. **(D)** *Smad4* KO does not affect Smad5 nucleocytoplasmic shuttling triggered by fluctuations of temperature, pH and osmolarity. Scale bar, 10  $\mu$ m. **(E)** Average fluorescence quantification of nuclear and cytoplasmic portions of GFP-Smad5 at various conditions in **D** (n=30; data are presented as mean  $\pm$  s.e.m. \*\*p < 0.01).
