# Supplementary material for: Smad5 acts as an intracellular pH messenger and maintains bioenergetic homeostasis
Source: PubMed Central journal article supplement (PMC5587853; doi:10.1038/cr.2017.85), 2017-07-04
Supplement: cr201785x6.pdf [file cr201785x6.pdf]

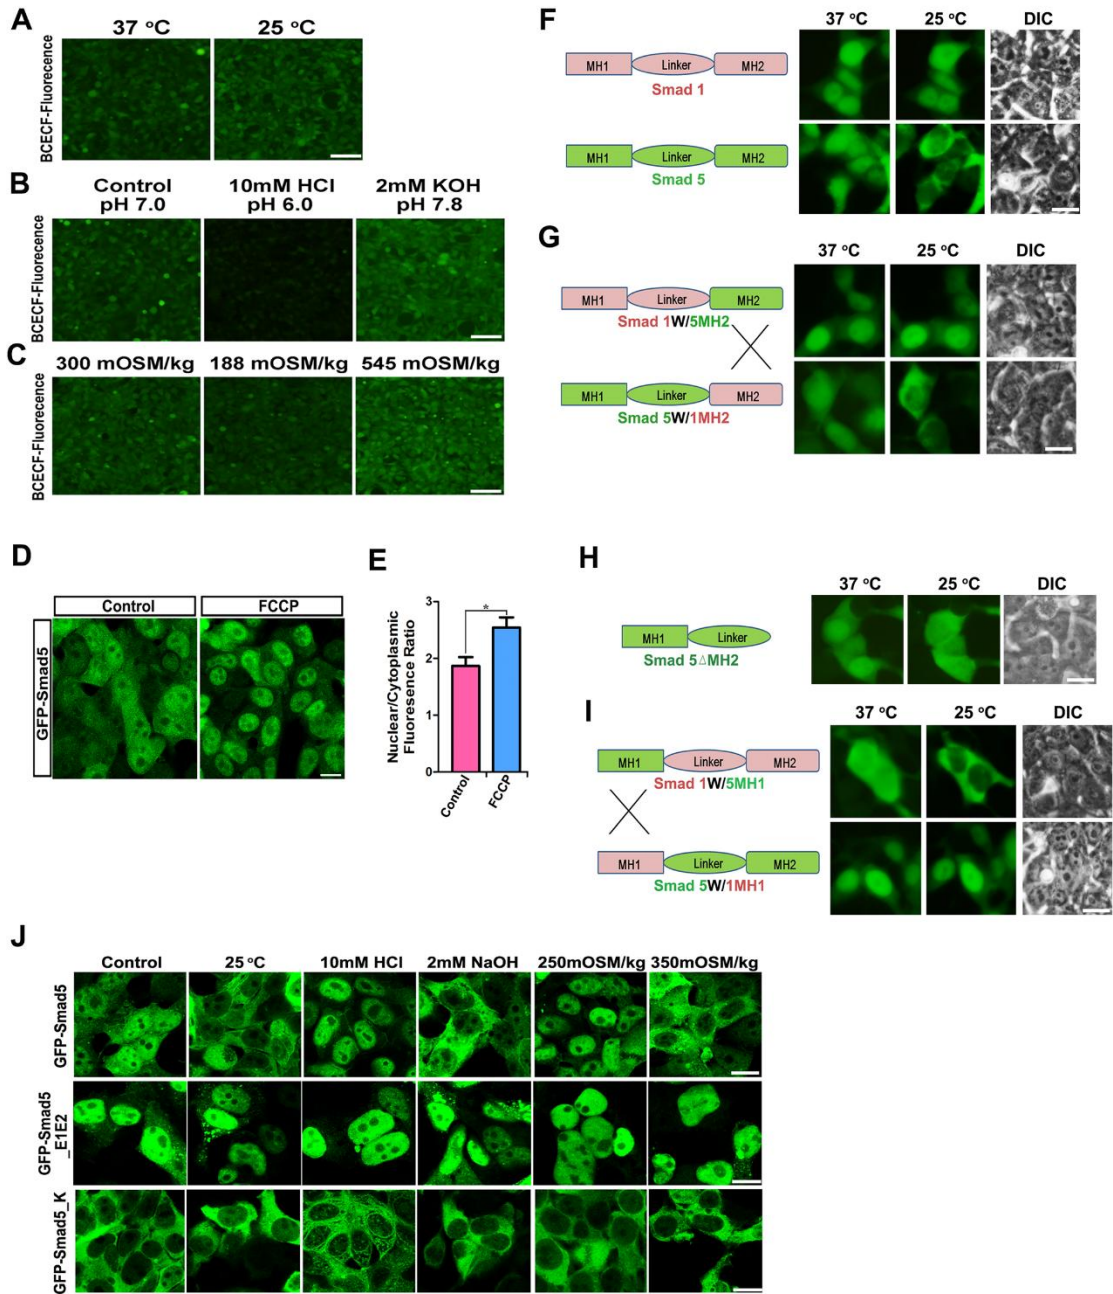

**Supplementary information, Figure S6.** Temperature, pHe and osmolarity fluctuations can induce pHi changes and Smad5 MH1 domain is responsible for pHi sensing. **(A)** Comparison of the fluorescence intensity of BCECF in HEK293 cells at 37°C and 25°C. Scale bar, 50 µm. **(B)** Comparison of the fluorescence intensity of BCECF at various extracellular pH solutions. Scale bar, 50 µm. **(C)** Representative images of intracellular BCECF fluorescence at various extracellular osmolarity. Scale bar, 50 µm. **(D)** FCCP treatment of *GFP-Smad5* HEK293 cells for 30 min promoted Smad5 nuclear accumulation. Scale bar, 10 µm. **(E)** Average fluorescence quantification of nuclear and cytoplasmic localized GFP-Smad5 in **D**. (n=30; data are mean ± s.e.m. \*p < 0.05). **(F)** Smad5, but not Smad1 transiently expressed in HEK293 cells shows quick nuclear export at 25°C. Scale bar, 10 µm. **(G)** Interchanging MH2 domains between Smad1 and Smad5 does not affect their own subcellular distribution at either 37°C or 25°C. Scale bar, 10 µm. **(H)** Mutant Smad5 with MH2 domain deleted shows moderate nuclear export 25 min after placing the cells at 25°C. Scale bar, 10 µm. **(I)** GFP-Smad5 with Smad1 MH1 domain resides in nucleus at both 37°C and 25°C. Whereas, GFP-Smad1 harboring Smad5 MH1 domain shows low temperature-induced nuclear export. Scale bar, 10 µm. **(J)** Nuclear and cytoplasm distribution of GFP-Smad5, GFP-Smad5\_E1E2 and GFP-Smad5\_K at various temperature, pHe and osmolarity conditions. Scale bars, 10 µm.
