# Supplementary material for: Smad5 acts as an intracellular pH messenger and maintains bioenergetic homeostasis
Source: PubMed Central journal article supplement (PMC5587853; doi:10.1038/cr.2017.85), 2017-07-04
Supplement: cr201785x7.pdf [file cr201785x7.pdf]

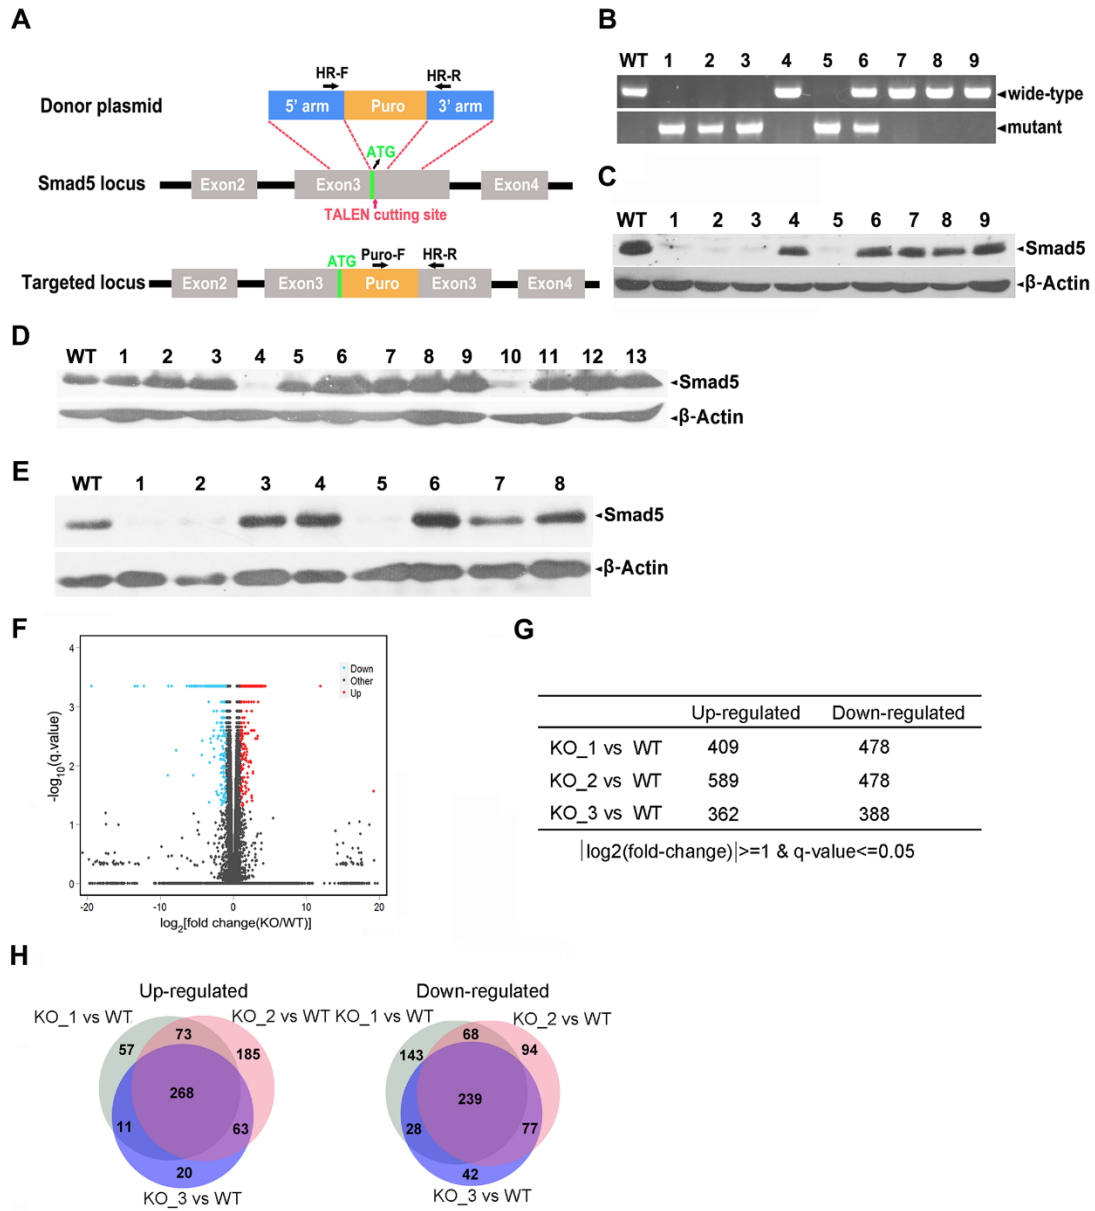

**Supplementary information, Figure S7.** Transcriptome analysis of WT and *Smad5* KO hESCs. **(A)** Schematic depiction of the strategy in construction of *Smad5* KO cell lines. **(B, C)** Genomic PCR **(B)** and western blotting **(C)** show *Smad5* KO efficiency in hESCs. **(D, E)** Western blotting shows *Smad5* KO efficiency in HEK293 **(D)** and HeLa **(E)** cells. **(F)** Volcano plot shows gene expression changes between *Smad5* KO and WT hESCs. Blue dots represent genes that are significantly down-regulated in KO cells, while the red dots represent genes that are significantly up-regulated in KO cells. **(G)** Number of up- or down-regulated genes in triplicate *Smad5* KO hESCs as compared with WT hESCs. **(H)** There is a significant overlap between up- or down-regulated genes in three biological replicates of hESCs.
