# Supplementary material for: Smad5 acts as an intracellular pH messenger and maintains bioenergetic homeostasis
Source: PubMed Central journal article supplement (PMC5587853; doi:10.1038/cr.2017.85), 2017-07-04
Supplement: cr201785x8.pdf [file cr201785x8.pdf]

**A**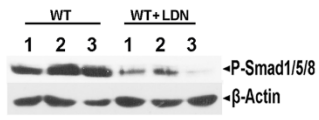**B**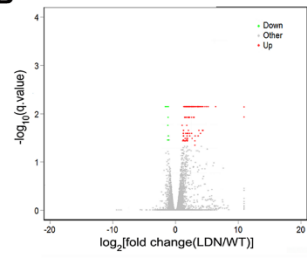**C**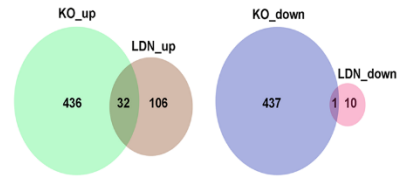**D**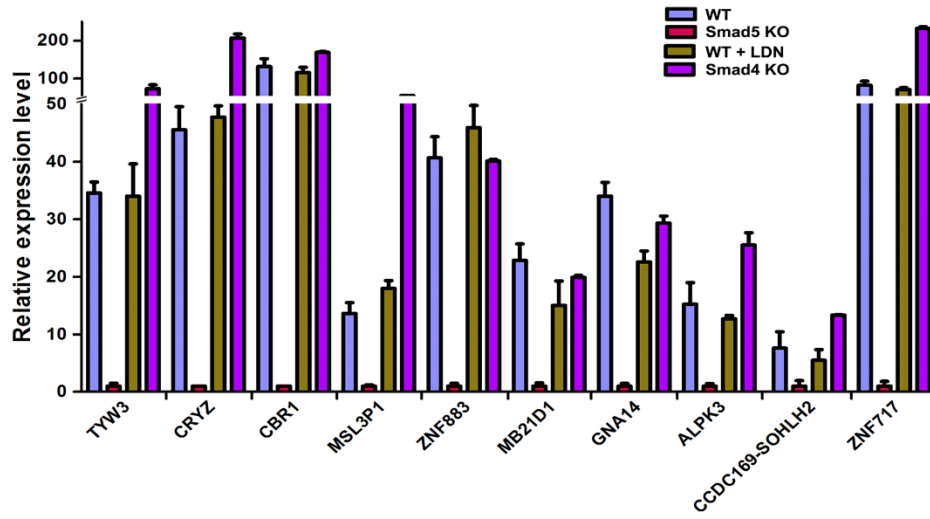

**Supplementary information, Figure S8.** Transcriptome analysis of WT and LDN treated hESCs. **(A)** Western blotting shows that most BMP-induced Smad1/5/8 SSXS phosphorylation is blocked after 4 days of LDN193189 treatment. **(B)** Transcriptional profiling of LDN193189 treated and untreated hESCs. **(C)** Minimal overlapping between differentially expressed genes in *Smad5* KO and LDN193189 treated hESCs. **(D)** qPCR analysis confirms the gene expression changes in *Smad5* KO hESCs. Each quantification was made from 3 independent images. Data are presented as mean  $\pm$  s.e.m.
