# Supplementary material for: Smad5 acts as an intracellular pH messenger and maintains bioenergetic homeostasis
Source: PubMed Central journal article supplement (PMC5587853; doi:10.1038/cr.2017.85), 2017-07-04
Supplement: cr201785x9.pdf [file cr201785x9.pdf]

**A**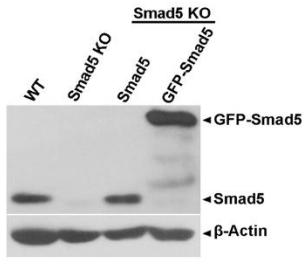**B**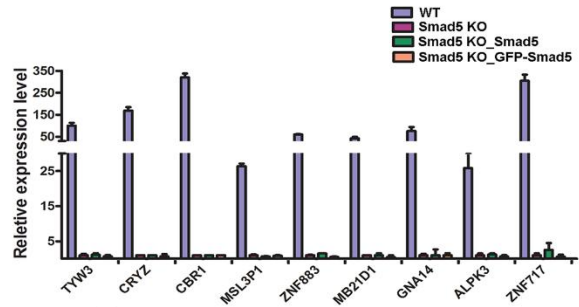**C**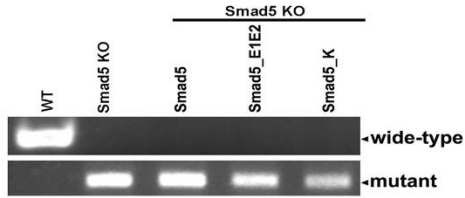**D**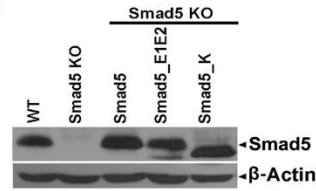**E**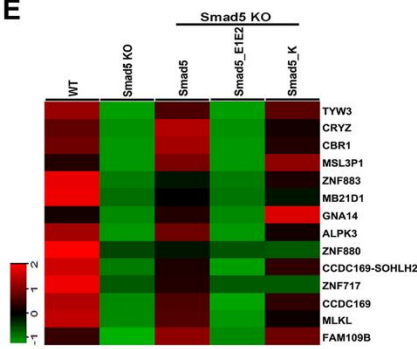**F**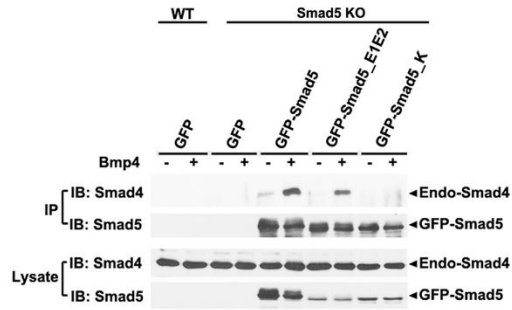**G**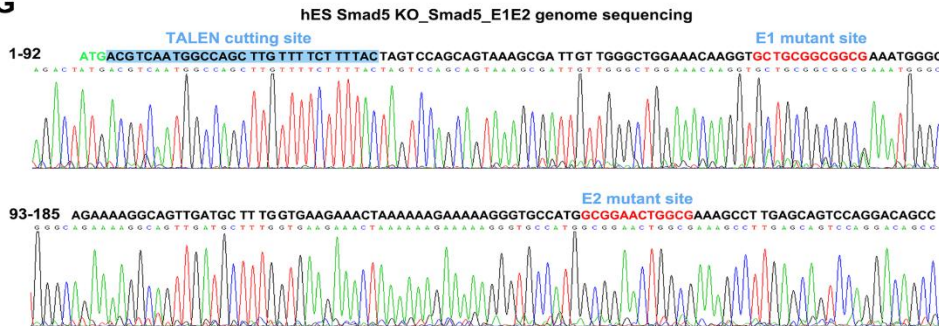

**Supplementary information, Figure S9.** Chronic metabolic adaptation of *Smad5* KO hESCs. **(A)** Western blotting confirms the reintroducing of *Smad5* or GFP-*Smad5* in *Smad5* KO hESCs through lentiviral infection. **(B)** Reintroducing of *Smad5* or GFP-*Smad5* in *Smad5* KO hESCs fails to rescue the mRNA expression of those downregulated genes caused by *Smad5* KO. Each quantification was made from 3 independent images. Data are presented as mean  $\pm$  s.e.m. **(C)** Genomic DNA PCR results showing *Smad5* KO efficiency in pre-rescued hESCs. **(D)** Western blotting showing preserved ectopic *Smad5*, *Smad5\_E1E2* and *Smad5\_K* expression after endogenous *Smad5* KO. **(E)** Heatmap of expression changes in WT, *Smad5* KO and pre-rescue hESCs. **(F)** HEK293 cells stably expressing *GFP*, *GFP-Smad5*, *GFP-Smad5\_E1E2* or *GFP-Smad5\_K* were stimulated with BMP4 for 1 hr. After immunoprecipitation with the GFP antibody, their interactions with *Smad4* were detected by western blotting. **(G)** Genome sequencing of pre-rescued *Smad5\_E1E2* hESCs.
