# Supplementary material for: Smad5 acts as an intracellular pH messenger and maintains bioenergetic homeostasis
Source: PubMed Central journal article supplement (PMC5587853; doi:10.1038/cr.2017.85), 2017-07-04
Supplement: cr201785x10.pdf [file cr201785x10.pdf]

**A**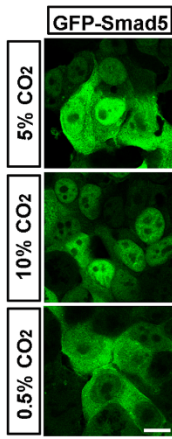**B**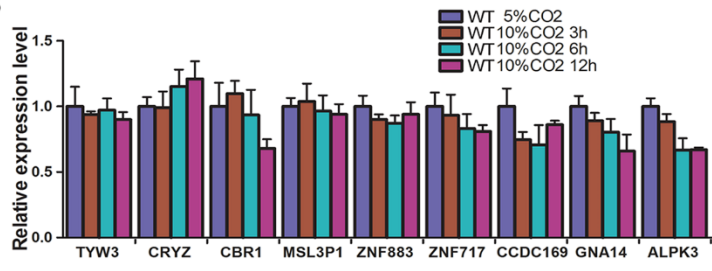**C**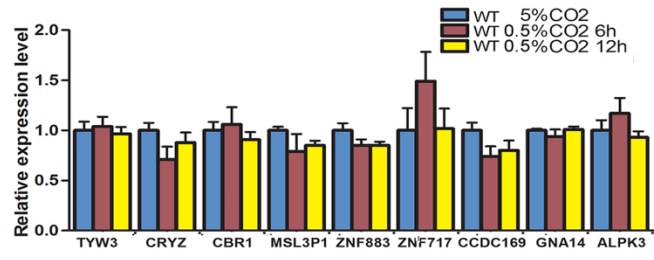

**Supplementary information, Figure S10.** Smad5 shuttling could not regulate metabolism-related gene expression. **(A)** Long-term maintenance of extracellular pH through adjusting CO<sub>2</sub> levels leads to efficient accumulation of GFP-Smad5 in the nucleus (10% CO<sub>2</sub>) or the cytoplasm (0.5% CO<sub>2</sub>). Scale bar, 10 μm. **(B, C)** qRT-PCR analyses showing no obvious gene expression change after acute extracellular pH adjustment at 5%, 10% CO<sub>2</sub> and 0.5% CO<sub>2</sub> for 3, 6 or 12 hours. Data are presented as mean ±s.e.m of three independent experiments.
