# Supplementary material for: Smad5 acts as an intracellular pH messenger and maintains bioenergetic homeostasis
Source: PubMed Central journal article supplement (PMC5587853; doi:10.1038/cr.2017.85), 2017-07-04
Supplement: cr201785x11.pdf [file cr201785x11.pdf]

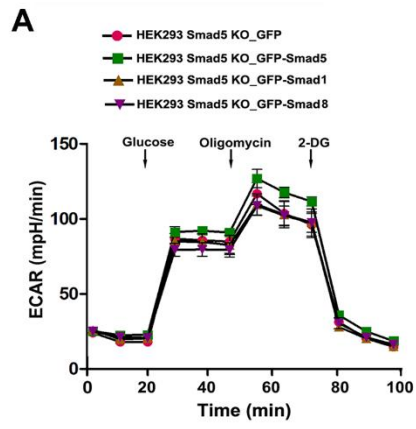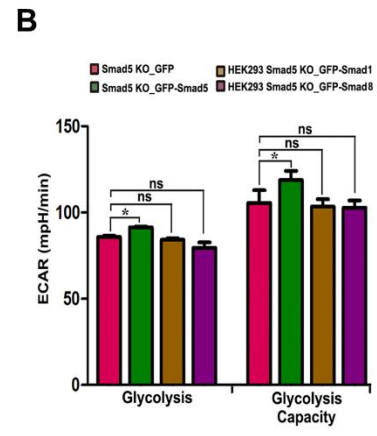

**Supplementary information, Figure S11.** *Smad5* KO reduces glycolysis. **(A)** *GFP*, *GFP-Smad5*, *GFP-Smad1* and *GFP-Smad8* were expressed in *Smad5* KO HEK293 cells, and extracellular acidification rate (ECAR) was measured by the Seahorse Analyzer (n = 6 each). **(B)** Statistics of glycolysis and glycolysis capacity in **A**. Data are represented as mean  $\pm$ s.e.m of 6 independent experiments. Unpaired two-tailed Student's *t*-test. \*p < 0.05.
