# Supplementary material for: Smad5 acts as an intracellular pH messenger and maintains bioenergetic homeostasis
Source: PubMed Central journal article supplement (PMC5587853; doi:10.1038/cr.2017.85), 2017-07-04
Supplement: cr201785x12.pdf [file cr201785x12.pdf]

**WT**

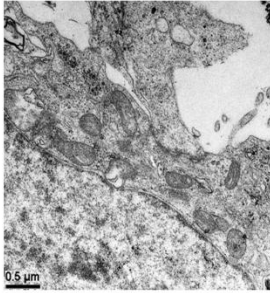

**Smad5 KO**

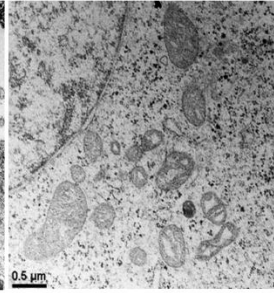

**pre-Smad5 KO\_Smad5**

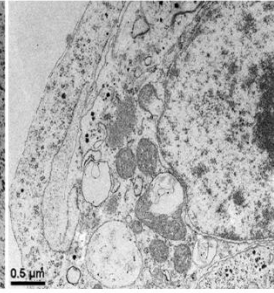

**post-Smad5 KO\_Smad5**

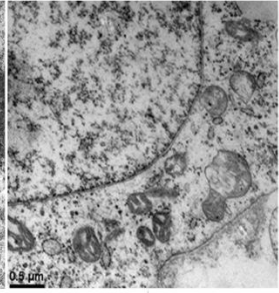

**Supplementary information, Figure S12.** *Smad5* KO induces irreversible mitochondrial morphology changes. Electron microscopy images show that re-expressing *Smad5* in *Smad5* KO hESCs through lentiviral infection could not rescue mitochondrial morphology caused by *Smad5* KO. While mitochondrial morphology could be rescued by pre-expression of *Smad5*. Scale bar, 0.5  $\mu\text{m}$ .
