# Supplementary material for: Smad5 acts as an intracellular pH messenger and maintains bioenergetic homeostasis
Source: PubMed Central journal article supplement (PMC5587853; doi:10.1038/cr.2017.85), 2017-07-04
Supplement: cr201785x13.pdf [file cr201785x13.pdf]

**A**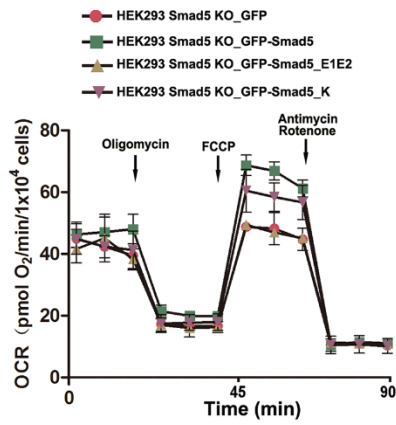**B**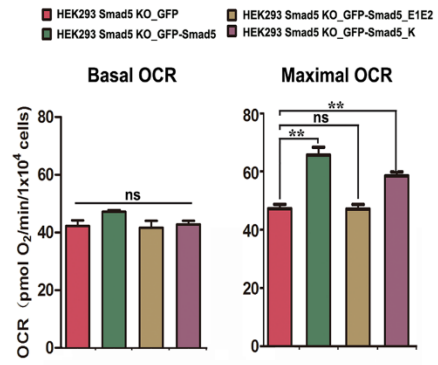**C**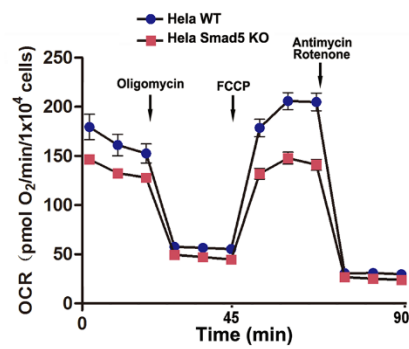**D**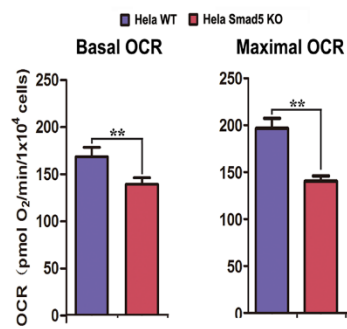**E**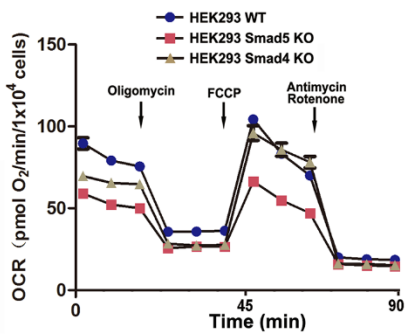**F**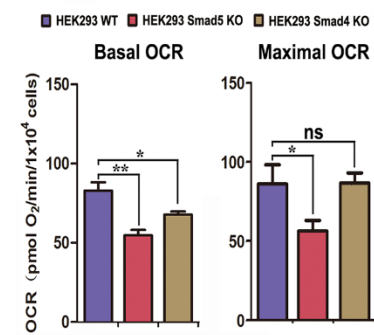**G**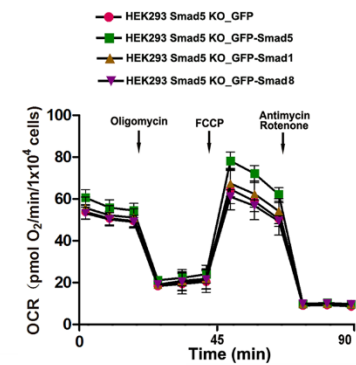**H**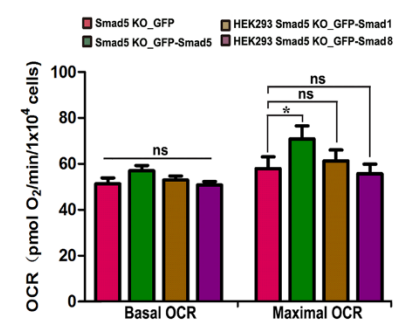

**Supplementary information, Figure S13.** *Smad5* KO impaired mitochondrial respiration. **(A)** *GFP*, *GFP-Smad5*, *GFP-Smad5\_E1E2* and *GFP-Smad5\_K* were expressed in *Smad5* KO HEK293 cells, and OCR was measured by the Seahorse Analyzer (n = 6 each). **(B)** Statistics of basal and maximal OCR in **A**. Data are represented as mean  $\pm$  s.e.m of 6 independent experiments. Unpaired two-tailed Student's *t*-test. \*\*p < 0.01. **(C)** Oxygen consumption rate (OCR) changes were measured in HeLa WT and *Smad5* KO cells by Seahorse Analyzer (n = 6 each). **(D)** Statistics of basal and maximal OCR in **C**. Data are represented as mean  $\pm$  s.e.m of 6 independent experiments. Unpaired two-tailed Student's *t*-test. \*\*p < 0.01. **(E)** Oxygen consumption rate (OCR) changes were measured in HEK293 WT , *Smad5* KO and *Smad4* KO cells by Seahorse Analyzer (n = 6 each). **(F)** Statistics of basal and maximal OCR in **E**. Data are represented as mean  $\pm$ s.e.m of 6 independent experiments. Unpaired two-tailed Student's *t*-test. \*p < 0.05. \*\*p < 0.01. **(G)** *GFP*, *GFP-Smad5*, *GFP-Smad1* and *GFP-Smad8* were expressed in *Smad5* KO HEK293 cells, and OCR was measured by the Seahorse Analyzer (n = 6 each). **(H)** Statistics of basal and maximal OCR in **G**. Data are represented as mean  $\pm$ s.e.m of 6 independent experiments. Unpaired two-tailed Student's *t*-test. \*p < 0.05.
