# Supplementary material for: Smad5 acts as an intracellular pH messenger and maintains bioenergetic homeostasis
Source: PubMed Central journal article supplement (PMC5587853; doi:10.1038/cr.2017.85), 2017-07-04
Supplement: cr201785x14.pdf [file cr201785x14.pdf]

**A**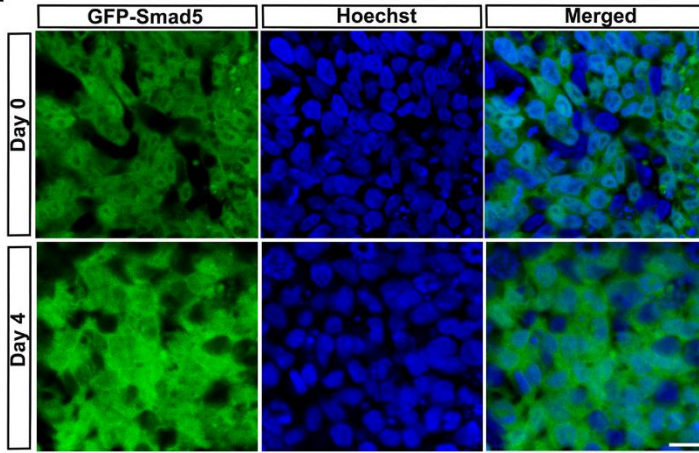**B**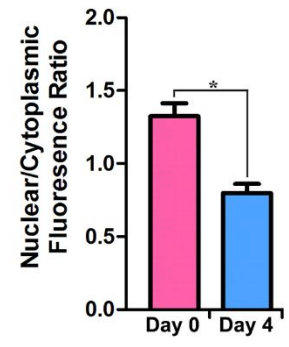

**Supplementary information, Figure S14.** Increased pHi during neural differentiation.

**(A)** Distribution of GFP-Smad5 at distinct steps of neural induction in *GFP-Smad5* hESCs. Day 0, hESC stage; Day 4, neuroectoderm. Scale bar, 10  $\mu\text{m}$ . **(B)** Average fluorescence quantification of nuclear and cytoplasmic localized GFP-Smad5 at different stages. (n=30; data are mean  $\pm$  s.e.m. \*p < 0.05).
