# Supplementary material for: Smad5 acts as an intracellular pH messenger and maintains bioenergetic homeostasis
Source: PubMed Central journal article supplement (PMC5587853; doi:10.1038/cr.2017.85), 2017-07-04
Supplement: cr201785x15.pdf [file cr201785x15.pdf]

**A**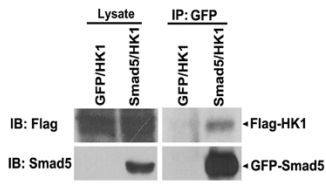**B**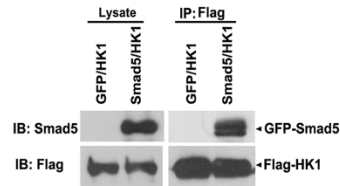**C**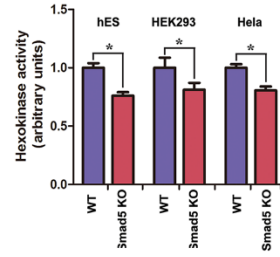**D**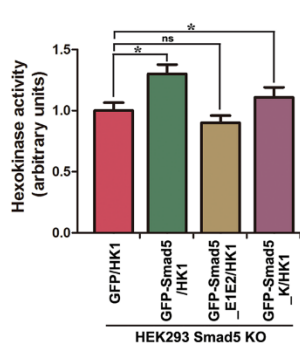**E**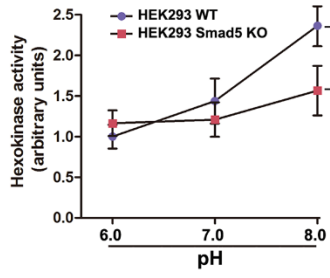**F**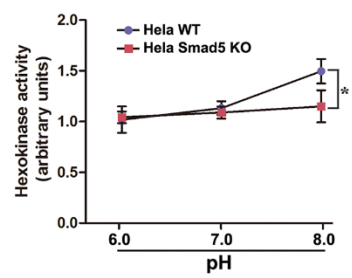**G**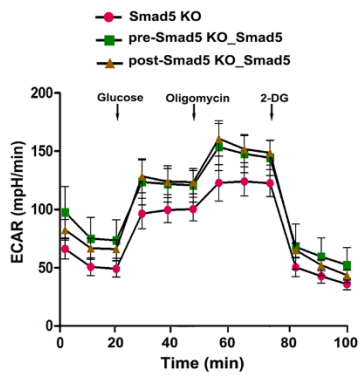**H**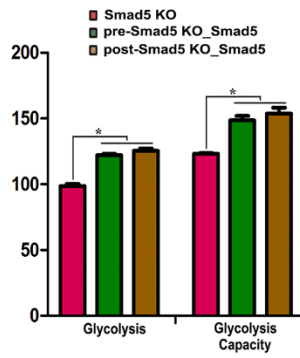

**Supplementary information, Figure S15.** Smad5 interacts with HK1. **(A, B)** HEK293 cells co-expressing of *Flag-HK1* and *GFP* or *GFP-Smad5* were immunoprecipitated with anti-GFP **(A)** or anti-Flag **(B)** antibody, and specific interaction of GFP-Smad5 with Flag-HK1 is shown by western blotting. **(C)** Hexokinase enzyme activity was measured in cytosolic fractions of WT and *Smad5* KO hES, HEK293 and HeLa cells. **(D)** Ectopic expressing of *GFP-Smad5* and *GFP-Smad5\_K* potentiates hexokinase enzyme activity in HEK293 cells. Data are presented as mean  $\pm$  s.e.m of three independent experiments. \* $p < 0.05$ . **(E-F)** WT and *Smad5* KO HEK293 cells **(E)** and HeLa cells **(F)** were incubated in buffers at a pH of 6.0, 7.0 or 8.0 buffer for 30 minutes, followed by hexokinase enzyme activity detection. Data are presented as mean  $\pm$  s.e.m of three independent experiments. \* $p < 0.05$ . **(G)** Extracellular acidification rate (ECAR) measured in hESCs was rescued by either post-knockout re-expression or pre-knockout overexpression of *Smad5* (n = 6 each). **(H)** Statistics of glycolysis and glycolysis capacity in **G**. Data are represented as mean  $\pm$  s.e.m of 6 independent experiments. Unpaired two-tailed Student's t-test. \* $p < 0.05$ .
