# Supplementary material for: Smad5 acts as an intracellular pH messenger and maintains bioenergetic homeostasis
Source: PubMed Central journal article supplement (PMC5587853; doi:10.1038/cr.2017.85), 2017-07-04
Supplement: cr201785x21.pdf [file cr201785x21.pdf]

**Supplementary information, Table S1.**

| <b>Smad5 (cytosolic) pull down proteins</b>               |           |
|-----------------------------------------------------------|-----------|
| Identified Proteins                                       | Gene Name |
| Mothers against decapentaplegic homolog 5                 | SMAD5     |
| Protein piccolo                                           | PCLO      |
| Tubulin beta chain                                        | TUBB      |
| Tubulin beta-2A chain                                     | TUBB2A    |
| Tubulin beta-2B chain                                     | TUBB2B    |
| Tubulin beta-4B chain                                     | TUBB4B    |
| Tubulin beta-4A chain                                     | TUBB4A    |
| Tubulin beta-3 chain                                      | TUBB3     |
| ATP synthase subunit beta, mitochondrial                  | ATP5B     |
| ATP synthase subunit alpha, mitochondrial                 | ATP5A1    |
| Actin, alpha cardiac muscle 1                             | ACTC1     |
| Sodium/potassium-transporting ATPase subunit alpha-3      | ATP1A3    |
| Dynamin-like 120 kDa protein, mitochondrial               | OPA1      |
| Heat shock protein HSP 90-beta                            | HSP90AB1  |
| Myelin basic protein                                      | MBP       |
| Putative keratin-87 protein                               | KRT87P    |
| Dihydropyrimidinase-related protein 2                     | DPYSL2    |
| Sodium/potassium-transporting ATPase subunit alpha-2      | ATP1A2    |
| Heat shock protein HSP 90-alpha                           | HSP90AA1  |
| Pyruvate kinase PKM                                       | PKM       |
| Elongation factor 1-alpha 1                               | EEF1A1    |
| Protein-L-isoaspartate(D-aspartate) O-methyltransferase   | PCMT1     |
| Peroxiredoxin-1 (Fragment)                                | PRDX1     |
| ADP/ATP translocase 3                                     | SLC25A6   |
| Glyceraldehyde-3-phosphate dehydrogenase                  | GAPDH     |
| Excitatory amino acid transporter 2                       | SLC1A2    |
| Enolase                                                   | ENO2      |
| Alpha-enolase                                             | ENO1      |
| Cytosol aminopeptidase                                    | LAP3      |
| Myelin proteolipid protein                                | PLP1      |
| Complement C4-B                                           | C4B       |
| Hexokinase-1                                              | HK1       |
| Histone H4                                                | HIST1H4A  |
| Mothers against decapentaplegic homolog 9                 | SMAD9     |
| Ras-related protein Rab-1B                                | RAB1B     |
| Ras-related protein Rab-10                                | RAB10     |
| Clathrin heavy chain                                      | CLTC      |
| ATPase family AAA domain-containing protein 3A (Fragment) | ATAD3A    |
| Guanine nucleotide-binding protein G(i) subunit alpha-1   | GNAI1     |

|                                                                             |           |
|-----------------------------------------------------------------------------|-----------|
| Syntaxin-binding protein 1                                                  | STXBP1    |
| Ras-related protein Rab-3A                                                  | RAB3A     |
| Heterogeneous nuclear ribonucleoprotein H                                   | HNRNPH1   |
| GTP-binding nuclear protein Ran                                             | RAN       |
| Fructose-bisphosphate aldolase (Fragment)                                   | ALDOA     |
| Antithrombin-III                                                            | SERPINC1  |
| Histone H2B type 1-K                                                        | HIST1H2BK |
| Histidine-rich glycoprotein                                                 | HRG       |
| Peroxiredoxin-2                                                             | PRDX2     |
| Alpha-internexin                                                            | INA       |
| Neurofilament medium polypeptide                                            | NEFM      |
| Neurofilament light polypeptide                                             | NEFL      |
| Eukaryotic initiation factor 4A-II                                          | EIF4A2    |
| Malate dehydrogenase                                                        | MDH2      |
| T-complex protein 1 subunit zeta                                            | CCT6A     |
| Synaptotagmin I, isoform CRA_b                                              | SYT1      |
| Guanine nucleotide-binding protein G(I)/G(S)/G(T) subunit beta-1 (Fragment) | GNB1      |
| Calmodulin                                                                  | CALM2     |
| Calcium-transporting ATPase                                                 | ATP2B1    |
| Prohibitin-2                                                                | PHB2      |
| Spectrin alpha chain, non-erythrocytic 1                                    | SPTAN1    |
| Probable ATP-dependent RNA helicase DDX5                                    | DDX5      |
| Synapsin-1                                                                  | SYN1      |
| V-type proton ATPase catalytic subunit A                                    | ATP6V1A   |
| Peroxiredoxin-4 (Fragment)                                                  | PRDX4     |
| Heterogeneous nuclear ribonucleoprotein M                                   | HNRNPM    |
| Transforming acidic coiled-coil-containing protein 3                        | TACC3     |
| Cilia- and flagella-associated protein 44 (Fragment)                        | CFAP44    |
| Tubulin alpha-4A chain                                                      | TUBA4A    |
